# Supplementary material for: m-Benzisubporphyrins: The First Subcarbaporphyrin and Its BIII Complex with An Unprecedented Planar Tridentate 14 π-Aromatic Network
Source: Research Square preprint supplement (doi:10.21203/rs.3.rs-5089725/v1), 2024-09-30

## checkCIF/PLATON report

Structure factors have been supplied for datablock(s) exp\_3736\_sq

THIS REPORT IS FOR GUIDANCE ONLY. IF USED AS PART OF A REVIEW PROCEDURE FOR PUBLICATION, IT SHOULD NOT REPLACE THE EXPERTISE OF AN EXPERIENCED CRYSTALLOGRAPHIC REFEREE.

No syntax errors found. CIF dictionary Interpreting this report

**Datablock: exp\_3736\_sq**

Bond precision: C-C = 0.0085 Å

Wavelength=1.54184

Cell: a=11.9190(12) b=12.5825(11) c=14.8081(16)  
alpha=104.186(8) beta=110.328(9) gamma=96.071(8)  
Temperature: 100 K

|                | Calculated                 | Reported       |
|----------------|----------------------------|----------------|
| Volume         | 1974.0 (4)                 | 1974.0 (4)     |
| Space group    | P -1                       | P -1           |
| Hall group     | -P 1                       | -P 1           |
| Moiety formula | C49 H39 B N2 O [+ solvent] | C49 H39 B N2 O |
| Sum formula    | C49 H39 B N2 O [+ solvent] | C49 H39 B N2 O |
| Mr             | 682.63                     | 682.63         |
| Dx, g cm-3     | 1.148                      | 1.148          |
| Z              | 2                          | 2              |
| Mu (mm-1)      | 0.519                      | 0.519          |
| F000           | 720.0                      | 720.0          |
| F000'          | 721.91                     |                |
| h, k, lmax     | 14, 14, 17                 | 14, 14, 17     |
| Nref           | 6973                       | 6960           |
| Tmin, Tmax     | 0.969, 0.974               | 0.593, 1.000   |
| Tmin'          | 0.949                      |                |

Correction method= # Reported T Limits: Tmin=0.593 Tmax=1.000  
AbsCorr = MULTI-SCAN

Data completeness= 0.998

$$\text{Theta (max)} = 66.599$$

R(reflections)= 0.0818( 3802)

```
wR2 (reflections)=  
0.2274 ( 6960)
```

$$S = 1.027$$

Npar= 485

---

The following ALERTS were generated. Each ALERT has the format

**test-name\_ALERT\_alert-type\_alert-level.**

Click on the hyperlinks for more details of the test.

---

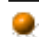

### Alert level B

PLAT420\_ALERT\_2\_B D-H Bond Without Acceptor O004 --H004 . Please Check

---

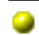

### Alert level C

DIFMN02\_ALERT\_2\_C The minimum difference density is < -0.1\*ZMAX\*0.75

\_refine\_diff\_density\_min given = -0.663

Test value = -0.600

DIFMN03\_ALERT\_1\_C The minimum difference density is < -0.1\*ZMAX\*0.75

The relevant atom site should be identified.

PLAT098\_ALERT\_2\_C Large Reported Min. (Negative) Residual Density -0.66 eA-3

PLAT340\_ALERT\_3\_C Low Bond Precision on C-C Bonds ..... 0.00851 Ang.

PLAT906\_ALERT\_3\_C Large K Value in the Analysis of Variance ..... 14.023 Check

PLAT906\_ALERT\_3\_C Large K Value in the Analysis of Variance ..... 2.509 Check

PLAT911\_ALERT\_3\_C Missing FCF Refl Between Thmin & STh/L= 0.595 13 Report

2 0 0, 0 1 0, -6-12 2, 2-14 4, -1-10 4, -7 -5 4,

-3 6 5, 2 8 9, -4 10 9, -5 9 11, -1 -4 12, -10 -8 13,

-6 7 13,

---

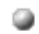

### Alert level G

PLAT003\_ALERT\_2\_G Number of Uiso or Uij Restrained non-H Atoms ... 1 Report

PLAT007\_ALERT\_5\_G Number of Unrefined Donor-H Atoms ..... 1 Report

H004

PLAT186\_ALERT\_4\_G The CIF-Embedded .res File Contains ISOR Records 1 Report

PLAT605\_ALERT\_4\_G Largest Solvent Accessible VOID in the Structure 259 A\*\*3

PLAT720\_ALERT\_4\_G Number of Unusual/Non-Standard Labels ..... 92 Note

O004 H004 N005 N006 C007 C008 C009 C00A

C00B C00C C00D C00E H00E C00F C00G H00G

C00H C00I C00J C00K C00L C00M C00N H00N

C00O H00O C00P C00Q H00Q C00R H00R C00S

H00S C00T C00U C00V C00W H00W C00X H00X

C00Y H00A H00B H00C C00Z C010 H010 C011

C012 H012 C013 C014 C015 C016 H016 C017

H01A H01B H01C C018 H018 C019 H01D H01E

H01F C01A H01G C01B H01H C01C H01I C01D

H01J C01E H01K C01F H01L C01G H01M C01H

H01N H01O H01P C01I H01Q H01R H01S C01J

H01T H01U H01V B01K

PLAT860\_ALERT\_3\_G Number of Least-Squares Restraints ..... 6 Note

PLAT869\_ALERT\_4\_G ALERTS Related to the Use of SQUEEZE Suppressed ! Info

PLAT883\_ALERT\_1\_G No Info/Value for \_atom\_sites\_solution\_primary . Please Do !

PLAT909\_ALERT\_3\_G Percentage of I>2sig(I) Data at Theta(Max) Still 41% Note

PLAT933\_ALERT\_2\_G Number of HKL-OMIT Records in Embedded .res File 3 Note

-4 10 9, -6 7 13, 0 1 0,

PLAT941\_ALERT\_3\_G Average HKL Measurement Multiplicity ..... 1.8 Low

PLAT969\_ALERT\_5\_G The 'Henn et al.' R-Factor-gap value ..... 1.60 Note

Predicted wr2: Based on SigI\*\*2 14.17 or SHELX Weight 23.05

PLAT978\_ALERT\_2\_G Number C-C Bonds with Positive Residual Density. 2 Info

---

|    |                      |                                                              |
|----|----------------------|--------------------------------------------------------------|
| 0  | <b>ALERT level A</b> | = Most likely a serious problem - resolve or explain         |
| 1  | <b>ALERT level B</b> | = A potentially serious problem, consider carefully          |
| 7  | <b>ALERT level C</b> | = Check. Ensure it is not caused by an omission or oversight |
| 13 | <b>ALERT level G</b> | = General information/check it is not something unexpected   |
|    |                      |                                                              |
| 2  | ALERT type 1         | CIF construction/syntax error, inconsistent or missing data  |
| 6  | ALERT type 2         | Indicator that the structure model may be wrong or deficient |
| 7  | ALERT type 3         | Indicator that the structure quality may be low              |
| 4  | ALERT type 4         | Improvement, methodology, query or suggestion                |
| 2  | ALERT type 5         | Informative message, check                                   |

---

It is advisable to attempt to resolve as many as possible of the alerts in all categories. Often the minor alerts point to easily fixed oversights, errors and omissions in your CIF or refinement strategy, so attention to these fine details can be worthwhile. In order to resolve some of the more serious problems it may be necessary to carry out additional measurements or structure refinements. However, the purpose of your study may justify the reported deviations and the more serious of these should normally be commented upon in the discussion or experimental section of a paper or in the "special\_details" fields of the CIF. checkCIF was carefully designed to identify outliers and unusual parameters, but every test has its limitations and alerts that are not important in a particular case may appear. Conversely, the absence of alerts does not guarantee there are no aspects of the results needing attention. It is up to the individual to critically assess their own results and, if necessary, seek expert advice.

### **Publication of your CIF in IUCr journals**

A basic structural check has been run on your CIF. These basic checks will be run on all CIFs submitted for publication in IUCr journals (*Acta Crystallographica*, *Journal of Applied Crystallography*, *Journal of Synchrotron Radiation*); however, if you intend to submit to *Acta Crystallographica Section C* or *E* or *IUCrData*, you should make sure that full publication checks are run on the final version of your CIF prior to submission.

### **Publication of your CIF in other journals**

Please refer to the *Notes for Authors* of the relevant journal for any special instructions relating to CIF submission.

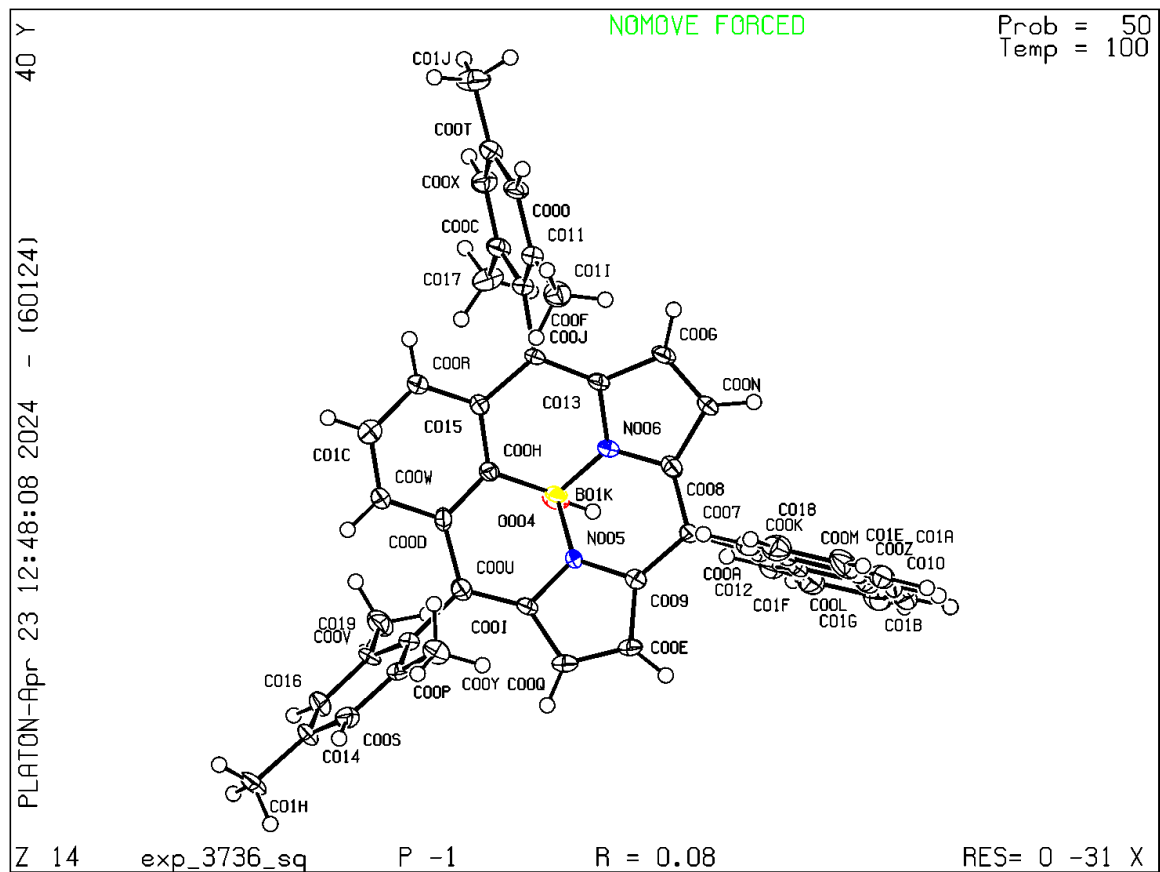

Supplement: Supplementary file 1 [file 0ec0f01609d1bacf8a0706c5.pdf]
