# Supplementary material for: m-Benzisubporphyrins: The First Subcarbaporphyrin and Its BIII Complex with An Unprecedented Planar Tridentate 14 π-Aromatic Network
Source: Research Square preprint supplement (doi:10.21203/rs.3.rs-5089725/v1), 2024-09-30

## checkCIF/PLATON report

Structure factors have been supplied for datablock(s) exp\_3498\_sq

THIS REPORT IS FOR GUIDANCE ONLY. IF USED AS PART OF A REVIEW PROCEDURE FOR PUBLICATION, IT SHOULD NOT REPLACE THE EXPERTISE OF AN EXPERIENCED CRYSTALLOGRAPHIC REFEREE.

No syntax errors found.      CIF dictionary      Interpreting this report

### Datablock: exp\_3498\_sq

---

Bond precision:      C-C = 0.0041 Å      Wavelength=1.54184

Cell:                      a=14.4553 (6)                      b=15.1300 (6)                      c=21.0270 (7)  
                             alpha=92.220 (3)                      beta=94.235 (3)                      gamma=98.658 (4)  
Temperature:              100 K

|                        | Calculated                  | Reported        |
|------------------------|-----------------------------|-----------------|
| Volume                 | 4528.2 (3)                  | 4528.2 (3)      |
| Space group            | P -1                        | P -1            |
| Hall group             | -P 1                        | -P 1            |
| Moiety formula         | C50 H41 B N2 O2 [+ solvent] | C50 H41 B N2 O2 |
| Sum formula            | C50 H41 B N2 O2 [+ solvent] | C50 H41 B N2 O2 |
| Mr                     | 712.66                      | 712.66          |
| Dx, g cm <sup>-3</sup> | 1.045                       | 1.045           |
| Z                      | 4                           | 4               |
| Mu (mm <sup>-1</sup> ) | 0.487                       | 0.487           |
| F000                   | 1504.0                      | 1504.0          |
| F000'                  | 1508.08                     |                 |
| h, k, lmax             |                             | 17, 18, 25      |
| Nref                   |                             | 15982           |
| Tmin, Tmax             | 0.907, 0.976                | 0.621, 1.000    |
| Tmin'                  | 0.907                       |                 |

Correction method= # Reported T Limits: Tmin=0.621 Tmax=1.000  
AbsCorr = MULTI-SCAN

Data completeness=                      Theta(max)= 66.600

|                                 |                   |
|---------------------------------|-------------------|
| R(reflections)= 0.0622 ( 11576) | wR2(reflections)= |
| S = 1.029                       | 0.1684 ( 15982)   |
| Npar= 1005                      |                   |

---

The following ALERTS were generated. Each ALERT has the format

**test-name\_ALERT\_alert-type\_alert-level.**

Click on the hyperlinks for more details of the test.

---

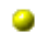

### Alert level C

DIFMN02\_ALERT\_2\_C The minimum difference density is < -0.1\*ZMAX\*0.75

\_refine\_diff\_density\_min given = -0.704

Test value = -0.600

DIFMN03\_ALERT\_1\_C The minimum difference density is < -0.1\*ZMAX\*0.75

The relevant atom site should be identified.

|                   |                                             |                                    |                 |
|-------------------|---------------------------------------------|------------------------------------|-----------------|
| PLAT098_ALERT_2_C | Large Reported Min.                         | (Negative) Residual Density        | -0.70 eA-3      |
| PLAT213_ALERT_2_C | Atom C84                                    | has ADP max/min Ratio              | 3.1 prolat      |
| PLAT220_ALERT_2_C | NonSolvent                                  | Resd 1 C Ueq(max)/Ueq(min) Range   | 4.4 Ratio       |
| PLAT222_ALERT_3_C | NonSolvent                                  | Resd 1 H Uiso(max)/Uiso(min) Range | 5.1 Ratio       |
| PLAT250_ALERT_2_C | Large U3/U1 Ratio for Average U(i,j) Tensor |                                    | 2.5 Note        |
| PLAT340_ALERT_3_C | Low Bond Precision on C-C Bonds             |                                    | 0.0041 Ang.     |
| PLAT906_ALERT_3_C | Large K Value in the Analysis of Variance   |                                    | 3.442 Check     |
| PLAT911_ALERT_3_C | Missing FCF Refl Between Thmin & Sth/L=     | 0.595                              | 9 Report        |
|                   | -16 8 6,                                    | 8 5 7, -16 7 7, -7 -9 12,          | 1 4 15, 1 4 16, |
|                   | -1 5 16,                                    | 4 2 18, -3 -7 23,                  |                 |

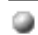

### Alert level G

|                   |                                                  |                  |             |
|-------------------|--------------------------------------------------|------------------|-------------|
| PLAT003_ALERT_2_G | Number of Uiso or Uij Restrained non-H Atoms     | ...              | 13 Report   |
| PLAT180_ALERT_4_G | Check Cell Rounding: # of Values Ending with 0   | =                | 3 Note      |
| PLAT186_ALERT_4_G | The CIF-Embedded .res File Contains ISOR Records |                  | 6 Report    |
| PLAT606_ALERT_4_G | Solvent Accessible VOID(S) in Structure          | .....            | ! Info      |
| PLAT860_ALERT_3_G | Number of Least-Squares Restraints               | .....            | 78 Note     |
| PLAT869_ALERT_4_G | ALERTS Related to the Use of SQUEEZE             | Suppressed       | ! Info      |
| PLAT883_ALERT_1_G | No Info/Value for _atom_sites_solution_primary   |                  | Please Do ! |
| PLAT909_ALERT_3_G | Percentage of I>2sig(I) Data at Theta(Max) Still |                  | 65% Note    |
| PLAT910_ALERT_3_G | Missing # of FCF Reflection(s) Below Theta(Min). |                  | 1 Note      |
|                   | 0 0 1,                                           |                  |             |
| PLAT933_ALERT_2_G | Number of HKL-OMIT Records in Embedded .res File |                  | 3 Note      |
|                   | -1 5 16,                                         | 8 5 7, -7 -9 12, |             |
| PLAT941_ALERT_3_G | Average HKL Measurement Multiplicity             | .....            | 1.9 Low     |
| PLAT978_ALERT_2_G | Number C-C Bonds with Positive Residual Density. |                  | 7 Info      |

- 
- 0 **ALERT level A** = Most likely a serious problem - resolve or explain  
0 **ALERT level B** = A potentially serious problem, consider carefully  
10 **ALERT level C** = Check. Ensure it is not caused by an omission or oversight  
12 **ALERT level G** = General information/check it is not something unexpected

- 2 ALERT type 1 CIF construction/syntax error, inconsistent or missing data  
8 ALERT type 2 Indicator that the structure model may be wrong or deficient  
8 ALERT type 3 Indicator that the structure quality may be low  
4 ALERT type 4 Improvement, methodology, query or suggestion  
0 ALERT type 5 Informative message, check
- 
-

It is advisable to attempt to resolve as many as possible of the alerts in all categories. Often the minor alerts point to easily fixed oversights, errors and omissions in your CIF or refinement strategy, so attention to these fine details can be worthwhile. In order to resolve some of the more serious problems it may be necessary to carry out additional measurements or structure refinements. However, the purpose of your study may justify the reported deviations and the more serious of these should normally be commented upon in the discussion or experimental section of a paper or in the "special\_details" fields of the CIF. checkCIF was carefully designed to identify outliers and unusual parameters, but every test has its limitations and alerts that are not important in a particular case may appear. Conversely, the absence of alerts does not guarantee there are no aspects of the results needing attention. It is up to the individual to critically assess their own results and, if necessary, seek expert advice.

### **Publication of your CIF in IUCr journals**

A basic structural check has been run on your CIF. These basic checks will be run on all CIFs submitted for publication in IUCr journals (*Acta Crystallographica*, *Journal of Applied Crystallography*, *Journal of Synchrotron Radiation*); however, if you intend to submit to *Acta Crystallographica Section C* or *E* or *IUCrData*, you should make sure that full publication checks are run on the final version of your CIF prior to submission.

### **Publication of your CIF in other journals**

Please refer to the *Notes for Authors* of the relevant journal for any special instructions relating to CIF submission.

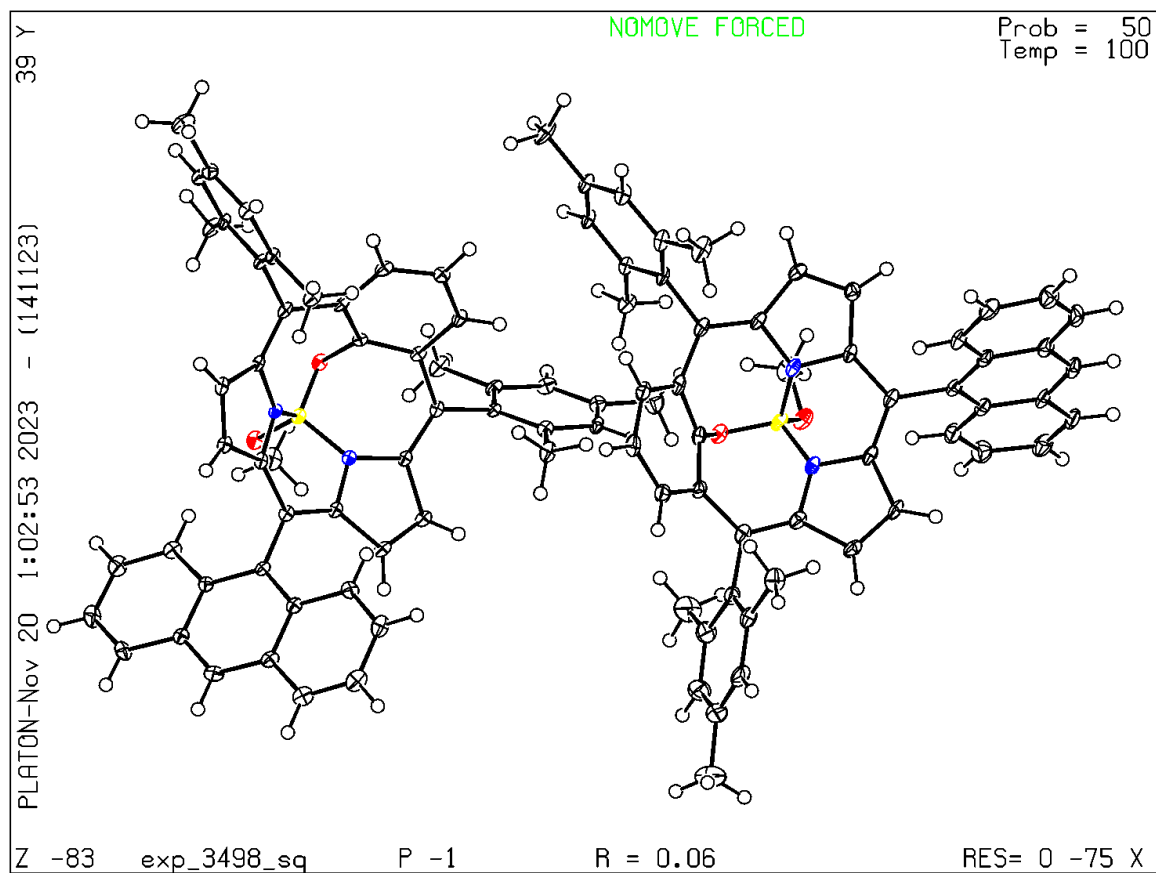

Supplement: Supplementary file 4 [file 97332d2075894f6a5e17ac5c.pdf]
